# Supplementary material for: Pancreatic stellate cells support tumour metabolism through autophagic alanine secretion
Source: Springer Nature journal article supplement (doi:10.1038/nature19084), 2016-08-09
Supplement: 41586_2016_BFnature19084_MOESM53_ESM.pdf [file 41586_2016_BFnature19084_MOESM53_ESM.pdf]

# SUPPLEMENTARY INFORMATION

doi:10.1038/nature19084

**a (EFig7e)**

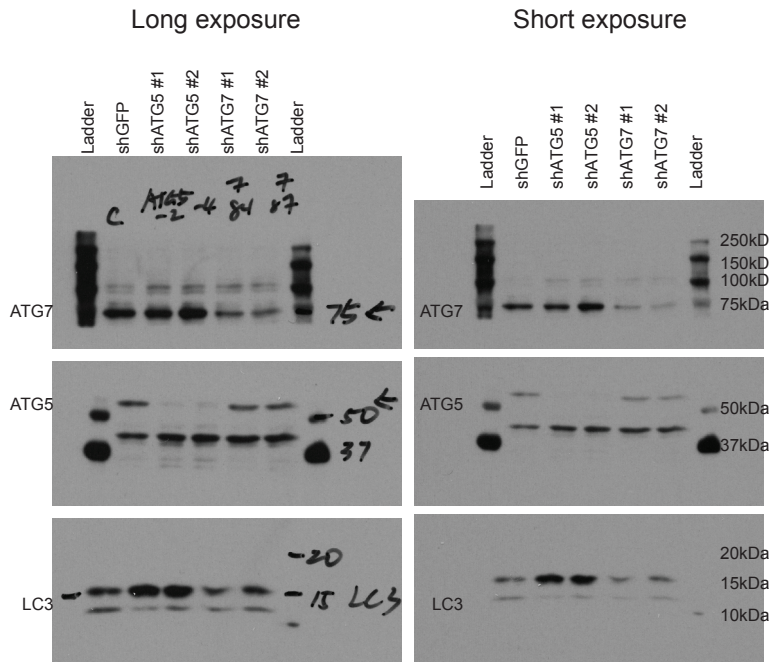

**b (ExtFig7f)**

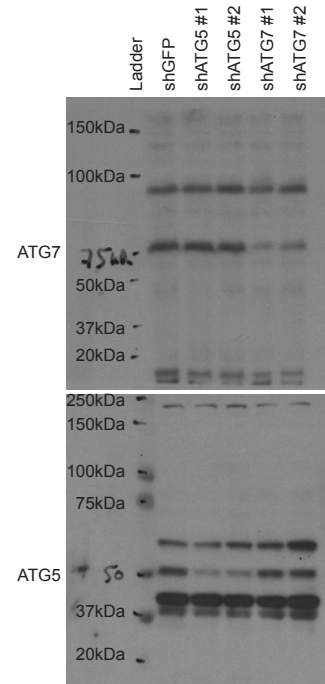

**c (ExtFig7l)**

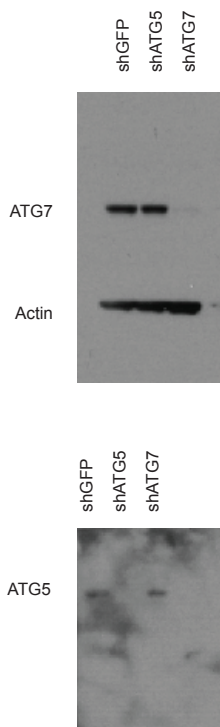

**d (ExtFig9a)**

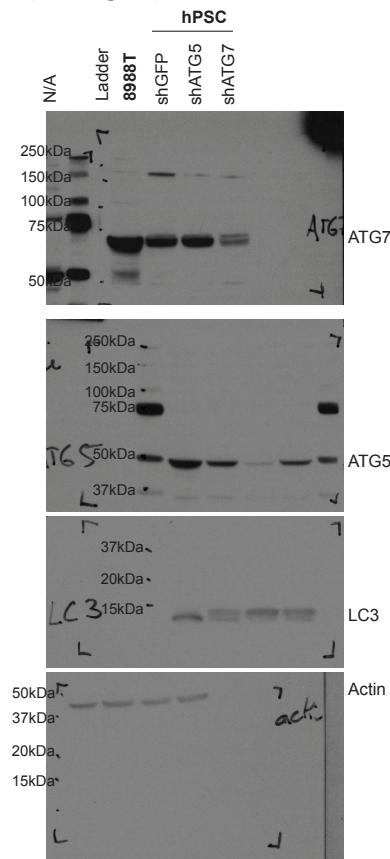

**e (ExtFig9i)**

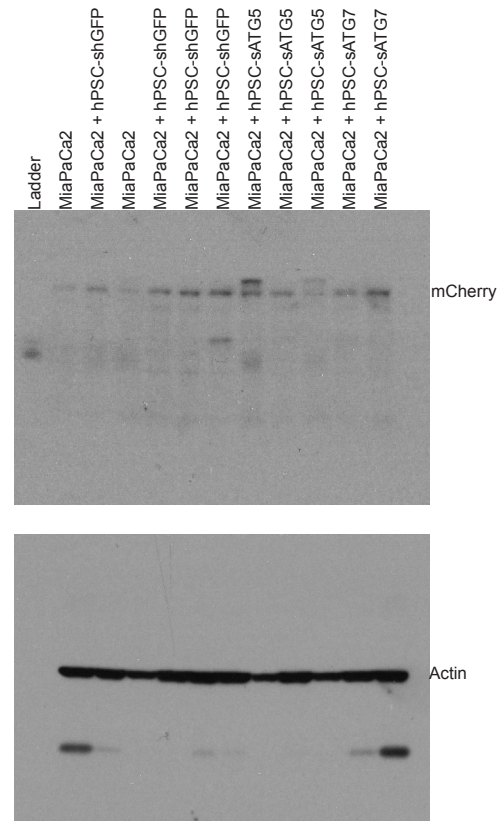

**Supplemental Figure 1**

a (EFig4b)

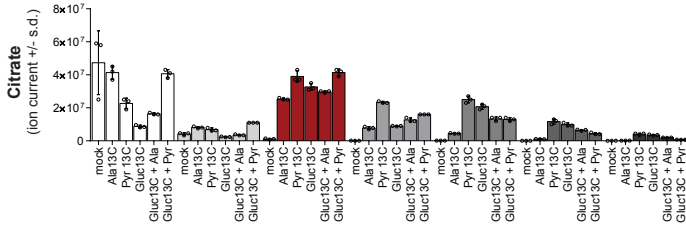

b (EFig4c)

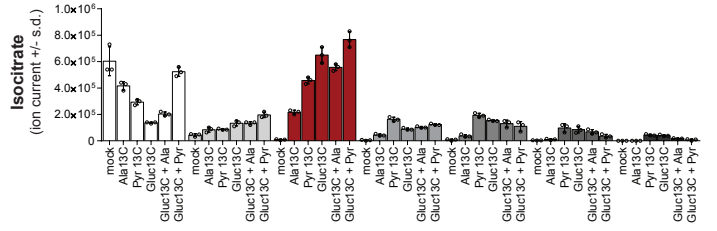

c (EFig4d)

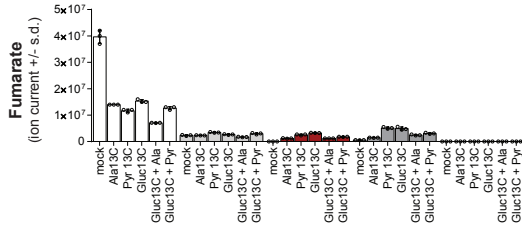

d (EFig4e)

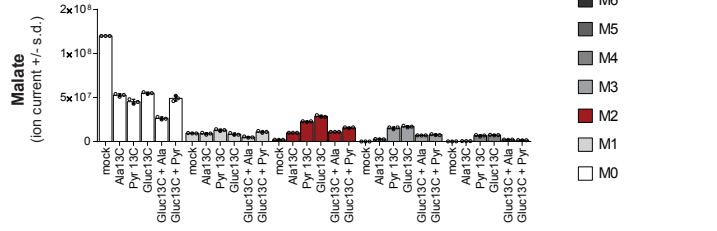

e (EFig4f)

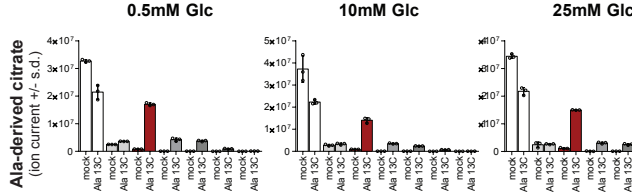

f (EFig4h)

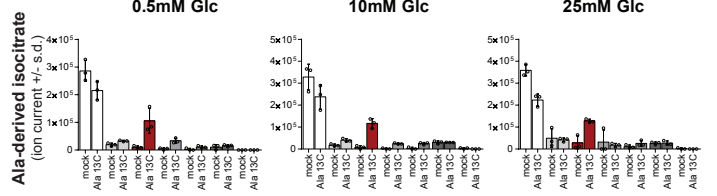

g (EFig4i)

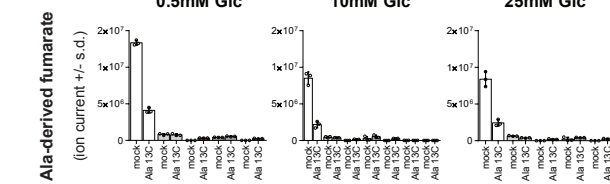

h (EFig4j)

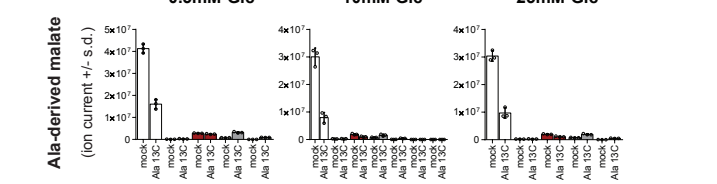

i (EFig4k)

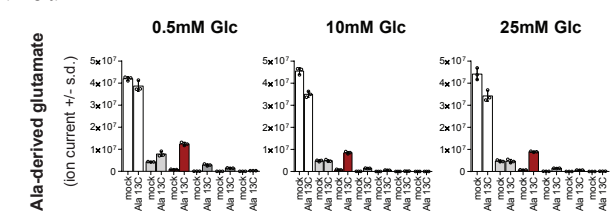

j (EFig4l)

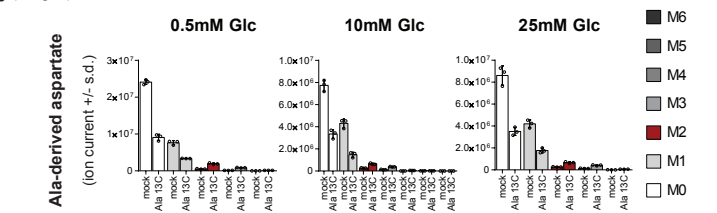

k (EFig6k)

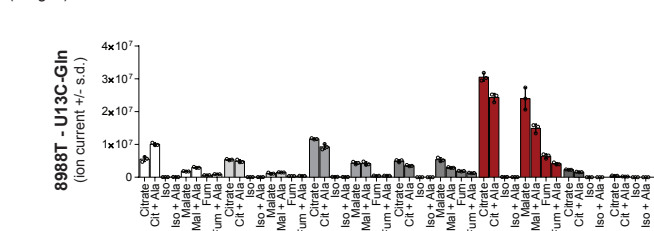

l (EFig6l)

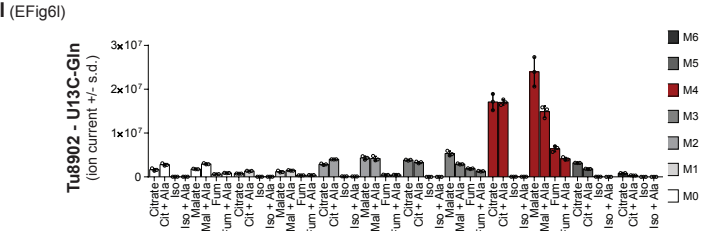

Supplemental Figure 2
